# Supplementary material for: Vimentin is required for tumor progression and metastasis in a mouse model of non–small cell lung cancer
Source: PubMed Central journal article supplement (PMC10275760; doi:10.1038/s41388-023-02703-9), 2023-05-09
Supplement: 41388_2023_2703_MOESM1_ESM.pdf [file 41388_2023_2703_MOESM1_ESM.pdf]

# Vimentin is Required for Tumor Progression and Metastasis in a Mouse Model of Non-Small Cell Lung Cancer

Alexandra L. Berr<sup>1,2</sup>, Kristin Wiese<sup>2</sup>, Gimena dos Santos<sup>2</sup>, Clarissa M. Koch<sup>2</sup>, Kishore R. Anekalla<sup>2</sup>, Martha Kidd<sup>2</sup>, Jennifer M. Davis<sup>2</sup>, Yuan Cheng<sup>2</sup>, Yuan-Shih Hu<sup>2</sup>, Karen M. Ridge<sup>2,3</sup>

<sup>1</sup>Department of Biomedical Engineering, Northwestern University, Chicago, IL, USA

<sup>2</sup>Division of Pulmonary and Critical Care Medicine, Northwestern University, Chicago, IL, USA

<sup>3</sup>Department of Cell and Molecular Biology, Northwestern University, Chicago, IL, USA

The authors have no conflicts of interest to declare.

Supported by: AB and KW were supported by NIH/NHLBI T32 HL076139; KRA was supported by David and Christina Cugell Fellowship; KMR was supported by NIH P01HL071643, R01HL128194, P01AG049665.

Corresponding Author:

Karen M. Ridge, PhD  
Northwestern University  
Division of Pulmonary and Critical Care  
Department of Cell and Molecular Biology  
303 E. Superior Avenue  
SQBRC 5-520  
Chicago, IL 60611  
[kridge@northwestern.edu](mailto:kridge@northwestern.edu)

## Supplemental Figure Legends

1  
2 **Supplemental Figure 1.** (A) Experimental design. *LSL-Kras<sup>G12D/+</sup>Tp53<sup>flox/flox</sup>* (*KPV<sup>+/+</sup>*) mice were  
3 crossed with vimentin-knockout (*Vim<sup>-/-</sup>*) mice. *KPV<sup>+/+</sup>* and *KPV<sup>-/-</sup>* mice were administered  
4 adenoviral Cre recombinase (Ad-Cre) which resulted in gene recombination at LoxP sites. As a  
5 control, null adenovirus (Ad-null) was administered to an independent cohort of mice. (B) Lungs  
6 were isolated from Ad-null-treated *KPV<sup>+/+</sup>* and *KPV<sup>-/-</sup>* mice, fixed, sectioned, and subjected to  
7 H&E staining and vimentin immunohistochemical staining. Positive vimentin staining is brown,  
8 and nuclei are blue. Scale bar: 200  $\mu$ m. (C) *Rosa26-LSL-LacZ* reporter mice were administered  
9 Ad-Null or Ad-Cre, and  $\beta$ -galactosidase staining was performed on whole lung samples; positive  
10 staining appears blue. (D) *KPV<sup>+/+</sup>* and *KPV<sup>-/-</sup>* mice were administered Ad-Null or Ad-Cre. Lungs  
11 were harvested at 2, 8, and 12 weeks following adenoviral infection. DNA was isolated from the  
12 tissue and PCR was performed to evaluate the presence of the wild-type (WT) and mutant (G12D)  
13 *Kras* transcript. (E) Tumor cells were isolated from Ad-Cre-infected mice at 6 weeks post-  
14 infection. A Western blot was performed on *KPV<sup>+/+</sup>* and *KPV<sup>-/-</sup>* whole cell lysates to detect WT  
15 and G12D-mutant KRAS. P53 mRNA (F) and protein levels (G) were detected through qRT-PCR  
16 and Western blot, respectively; MLE-12 cells were used as a positive control. (H) *KPV<sup>+/+</sup>* and  
17 *KPV<sup>-/-</sup>* mice were infected with null or Cre recombinase adenovirus (Ad-Null and Ad-Cre,  
18 respectively) and were imaged at 2, 6, and 10 weeks post-infection (w.p.i.). Representative MRI  
19 coronal (*left*) and transverse (*right*) images are shown. Hearts (H) are outlined in white. (I) Positive  
20 staining was quantified from lung sections stained with either TTF-1 or Ki67 (see **Figure 1D** for  
21 representative images) and normalized to either total lung area (TTF-1) or total tumor cell count  
22 (Ki67) (n=2-5). (J) *KPV<sup>+/+</sup>* and *KPV<sup>-/-</sup>* cells were plated overnight and were then treated with BrdU  
23 for 4 hours. BrdU incorporation was detected and normalized to the *KPV<sup>+/+</sup>* condition for each  
24 independent trial (n=4). Data were compared using an unpaired, two-tailed t-test (\*\*p<0.01). (K)  
25 H&E-stained lung sections from 8 or 12 w.p.i. were evaluated for tumor grade by a pathologist.

26 (J) Human lung tissue sections (or lymph node tissue where indicated) were stained with  
27 antibodies against vimentin. LUAD=lung adenocarcinoma. Positive vimentin staining is brown,  
28 and nuclei are blue. Scale bar: 200  $\mu$ m. Data are presented as the mean  $\pm$  standard deviation.

29

30 **Supplemental Figure 2.** (A)  $KPV^{+/+}$  and  $KPV^{-/-}$  cell lysates were subjected to a Western blot to  
31 detect E-cadherin, N-cadherin, vimentin, and actin. Band signal was quantified and normalized to  
32 actin loading controls and average  $KPV^{+/+}$  signal. Data were compared using an unpaired, two-  
33 tailed t-test (\* $p < 0.01$ ; \*\*\* $p < 0.001$ ; \*\*\*\* $p < 0.0001$ ). (B)  $KPV^{+/+}$  and  $KPV^{-/-}$  cells were stained for  
34 vimentin (*green*), for keratin 8 (*red*), and with Hoechst nuclear dye (*blue*). Scale bar: 10  $\mu$ m. (C-  
35 E) Messenger RNA from  $KPV^{+/+}$  and  $KPV^{-/-}$  cell lysates was quantified via RNA sequencing. (C)  
36 Principal component analysis (PCA) plot with each point representing one replicate (*black*,  $KPV^{+/+}$ ;  
37 *grey*,  $KPV^{-/-}$ ). (D) Pearson's correlation plot. The correlation coefficient for each comparison is  
38 shown. (E) MA plot. Genes of interest are indicated. (F) Lungs were harvested from  $KPV^{+/+}$  and  
39  $KPV^{-/-}$  mice at 7 w.p.i., fixed, sectioned, and subjected to immunohistochemistry with antibodies  
40 against E-cadherin and N-cadherin. Scale bar: 1 mm (whole lung), 100  $\mu$ m (insets).  
41 Representative images and quantification of positive staining are shown (n=2-5).

42

43 **Supplemental Figure 3.** (A) A549 cells were treated with 2  $\mu$ M withaferin A (WFA) for 1 hour.  
44 Cells were fixed and stained for vimentin (white). A phase contrast image was used to identify cell  
45 borders (dashed line). Scale bar: 10  $\mu$ m, 5  $\mu$ m (*inset*). (B) A549 cells were treated with WFA for  
46 the indicated dose and time. A Western blot is shown; vimentin and GAPDH antibodies were used  
47 to probe for these proteins. (C) A549 cells were treated with DMSO control or 1 or 2  $\mu$ M WFA and  
48 subjected to a scratch wound assay. After 24 hours, wound closure was assessed.  
49 Representative images (*left*) and quantitation (*right*) are shown. Data were compared to the  
50 vehicle control using an unpaired, two-tailed t-test (\* $p < 0.05$ ; \*\*\* $p < 0.001$ ).

51

52 **Supplemental Figure 4. (A)** Lungs isolated from vehicle- or WFA-treated  $KPV^{+/+}$  mice at 6 weeks  
53 after adenoviral Cre infection were fixed, sectioned, and subjected to immunohistochemistry for  
54 the indicated markers; slides were scanned and signal was quantified using Histoquest. TTF-1  
55 and Ki67 were normalized to total lung area. Data were subject to an unpaired, two-tailed t-test  
56 (\*\* $p < 0.01$ ; \*\*\* $p < 0.001$ ). **(B)** Lungs isolated from vehicle- and WFA-treated  $KPV^{+/+}$  mice were  
57 sectioned and stained for phospho-Serine55 vimentin (green) and DAPI. Scale bar: 50  $\mu\text{m}$ , 5  $\mu\text{m}$   
58 (*insets*).

59  
60 **Supplemental Figure 5. (A)** Select gene expression values from RNA sequencing. All gene  
61 comparisons shown ( $KPV^{+/+}$  vs.  $KPV^{-/-}$ ) have  $\text{FDR} < 0.05$  after adjusting for multiple comparisons;  
62 therefore, all gene differences shown between  $KPV^{+/+}$  vs.  $KPV^{-/-}$  cells are statistically significant.  
63 **(B)** SLC7A11 levels were measured by Western blot and normalized to an actin loading control  
64 and the average  $KPV^{+/+}$  control. **(C)** Metabolite data were normalized to the total ion count per  
65 sample, log-transformed, and subjected to an unpaired, two-tailed t-test. P-values were corrected  
66 for multiple comparisons (\*adjusted  $p$ -value  $< 0.05$ ). **(D)** Lungs were harvested from  $KPV^{+/+}$  mice  
67 treated with WFA or vehicle control at 6 weeks after adenoviral Cre infection, fixed, sectioned,  
68 and subjected to anti-GPX antibody staining. Scale bar: 1 mm. **(E)**  $KPV^{+/+}$  and  $KPV^{-/-}$  cells were  
69 treated with the ML162 (1  $\mu\text{M}$ ), DFO (100  $\mu\text{M}$ ), and/or Fer-1 (10  $\mu\text{M}$ ) for 48 hours; cell death was  
70 quantified with an LDH assay. Groups were compared using a 2-way ANOVA with multiple  
71 comparisons. All data are presented as the mean  $\pm$  standard deviation. (\*\*\*\* $p < 0.0001$ ). **(F)** A  
72 schematic model representing the ferroptosis-related mechanisms that are affected by loss of  
73 vimentin in KRAS-mutant, p53-null lung adenocarcinoma cells. Created with BioRender.com

74  
75 **Supplemental Figure 6. (A)** Luciferase-tagged  $KPV^{+/+}$  ( $Luc$ - $KPV^{+/+}$ ) cells were treated with  
76 CRISPR-Cas9 to knock out vimentin ( $Luc$ - $KPV^{-/-}$ ). Cells were subjected to a Western blot and  
77 probed for vimentin and actin. **(B)** Representative IVIS images for each week after flank injection

78 (n=9-11 mice per group). At 3 weeks post-injection, primary tumors were removed and lung  
79 metastases were tracked for an additional 1 week. Intensity overlays show the accumulation of  
80 luciferase-labeled cells. Luciferin signal was quantified from primary flank tumors (**C**) and the  
81 lungs (**D**). (**F**) Flank tumor volume was measured with calipers each week. Volume was calculated  
82 using the formula  $\text{Volume} = (\text{length}^2 \times \text{width}) / 2$ . For **C-E**, data were subjected to a two-way ANOVA  
83 with multiple comparisons. (**G**) At week 3, tumors were removed and weighed. For **G**, data were  
84 subjected to a one-way ANOVA with multiple comparisons. (\* $p < 0.05$ ; \*\* $p < 0.01$ ). Data are  
85 presented as the mean  $\pm$  standard deviation.

86

87 **Supplemental Table 1.** List of antibodies used. For proteins with multiple antibodies used, the  
88 figures in which they are used are indicated. If no figure is indicated, the antibody was used for  
89 all instances in which that protein was detected. **WB**=Western blot; **IHC**=immunohistochemistry;  
90 **IF**=immunofluorescence.

91

92
